# Supplementary material
Source: PubMed Central journal article supplement (PMC5656476)
Supplement: jcsm.13.11.1273s1.pdf [file jcsm.13.11.1273s1.pdf]

**Table S1. Baseline characteristics of the patients according to sex.**

|                                                | Total<br>(n = 276) | Male (n = 153)        |                             | P-value | Female (n = 123)      |                             | P-value |
|------------------------------------------------|--------------------|-----------------------|-----------------------------|---------|-----------------------|-----------------------------|---------|
|                                                |                    | END group<br>(n = 20) | Non- END group<br>(n = 133) |         | END group<br>(n = 22) | Non- END group<br>(n = 101) |         |
| Age (mean±SD), years                           | 69.2±11.1          | 67.2±11.1             | 68.2±10.8                   | 0.693   | 71.3±8.9              | 70.6±11.8                   | 0.788   |
| BMI (kg/m <sup>2</sup> ), n (%)                |                    |                       |                             | 0.242   |                       |                             | 0.529   |
| BMI < 25                                       | 194 (70.3)         | 12 (60.0)             | 103 (77.4)                  |         | 14 (63.6)             | 65 (64.4)                   |         |
| 25≤ BMI <30                                    | 72 (26.1)          | 7 (35.0)              | 26 (19.5)                   |         | 8 (36.4)              | 31 (30.7)                   |         |
| BMI ≥ 30                                       | 10 (3.6)           | 1 (5.0)               | 4 (3.0)                     |         | 0 (0.0)               | 5 (5.0)                     |         |
| Hypertension, n (%)                            | 199 (72.1)         | 16 (80.0)             | 92 (69.2)                   | 0.322   | 16 (72.7)             | 75 (74.3)                   | 0.882   |
| Diabetes mellitus, n (%)                       | 74 (26.8)          | 7 (35.0)              | 36 (27.1)                   | 0.462   | 6 (27.3)              | 25 (24.8)                   | 0.805   |
| Hyperlipidemia, n (%)                          | 96 (34.8)          | 6 (30.0)              | 46 (34.6)                   | 0.686   | 11 (50.0)             | 33 (32.7)                   | 0.124   |
| Smoking, n (%)                                 | 87 (31.5)          | 10 (50.0)             | 61 (45.9)                   | 0.730   | 4 (18.2)              | 12 (11.9)                   | 0.484   |
| Previous stroke/TIA, n (%)                     | 81 (29.3)          | 3 (15.0)              | 39 (29.3)                   | 0.181   | 6 (27.3)              | 33 (32.7)                   | 0.622   |
| Atrial fibrillation, n (%)                     | 71 (25.7)          | 5 (25.0)              | 29 (21.8)                   | 0.775   | 3 (13.6)              | 34 (33.7)                   | 0.063   |
| Pulmonary diseases, n (%)                      |                    |                       |                             | 0.813   |                       |                             | 0.113   |
| COPD, n (%)                                    | 3 (1.1)            | 0 (0.0)               | 2 (1.5)                     |         | 1 (4.5)               | 0 (0.0)                     |         |
| Chronic asthma, n (%)                          | 4 (1.4)            | 0 (0.0)               | 1 (0.8)                     |         | 1 (4.5)               | 2 (2.0)                     |         |
| Lung cancer, n (%)                             | 8 (2.9)            | 1 (5.0)               | 3 (2.3)                     |         | 0 (0.0)               | 4 (4.0)                     |         |
| Initial NIHSS [median, (IQR)]                  | 3 (1-8)            | 3 (3–7.75)            | 2 (1-6.0)                   | 0.079   | 4 (2.75-7.25)         | 5 (2-14)                    | 0.487   |
| Discharge NIHSS [median, (IQR)]                | 2 (0-5)            | 5.5(3.25–8.0)         | 1 (0–4)                     | <0.001  | 4 (1-9)               | 2 (0-5.5)                   | 0.183   |
| Stroke mechanism, n (%)                        |                    |                       |                             | 0.609   |                       |                             | 0.127   |
| LAA                                            | 82 (29.7)          | 6 (30.0)              | 40 (30.1)                   |         | 7 (31.8)              | 29 (28.7)                   |         |
| SVO                                            | 47 (17.0)          | 6 (30.0)              | 23 (17.3)                   |         | 6 (27.3)              | 12 (11.9)                   |         |
| CE                                             | 90 (32.6)          | 4 (20.0)              | 43 (32.3)                   |         | 3 (13.6)              | 40 (39.6)                   |         |
| Other determined                               | 27 (9.8)           | 1 (5.0)               | 11 (8.3)                    |         | 3 (13.6)              | 12 (11.9)                   |         |
| Undetermined                                   | 30 (10.9)          | 3 (15.0)              | 16 (12.0)                   |         | 3 (13.6)              | 8 (7.9)                     |         |
| Lesion location, n (%)                         |                    |                       |                             | 0.549   |                       |                             | 0.546   |
| Anterior circulation                           | 165 (59.8)         | 13 (65.0)             | 74 (55.6)                   |         | 14 (63.6)             | 64 (63.4)                   |         |
| Posterior circulation                          | 68 (24.6)          | 3 (15.0)              | 35 (26.3)                   |         | 4 (18.2)              | 26 (25.7)                   |         |
| Multiple territory                             | 43 (15.6)          | 4 (20.0)              | 24 (18.0)                   |         | 4 (18.2)              | 11 (10.9)                   |         |
| Significant stenosis on relevant artery, n (%) | 125 (45.3)         | 9 (45.0)              | 58 (43.6)                   | 0.907   | 8 (36.4)              | 50 (49.5)                   | 0.263   |
| SU stay (days, mean±SD)                        | 2.2±1.3            | 2.5±1.3               | 2.1±1.3                     | 0.207   | 2.6±1.5               | 2.2±1.3                     | 0.181   |

END: early neurological deterioration, SD: standard deviation, BMI: body mass index, TIA: transient ischemic attack, CHF: congestive heart failure, COPD: chronic obstructive pulmonary disease, TB: Tuberculosis, NOD: nocturnal oxygen desaturation, LAA: large artery atherosclerosis, SVO: small-vessel occlusion, CE: cardioembolism, SU: Stroke Unit

**Table S2. Monitoring data in the Stroke Unit in patients with and without early neurologic deterioration according to sex.**

|                                                     | Total<br>(n = 276) | Male (n = 153)        |                             |                 | Female (n = 123)      |                             |                 |
|-----------------------------------------------------|--------------------|-----------------------|-----------------------------|-----------------|-----------------------|-----------------------------|-----------------|
|                                                     |                    | END group<br>(n = 20) | Non- END group<br>(n = 133) | <i>P</i> -value | END group<br>(n = 22) | Non- END group<br>(n = 101) | <i>P</i> -value |
| <b>NOD, n (%)</b>                                   | 49 (17.8)          | 9 (45.0)              | 15 (11.3)                   | 0.001           | 10 (45.5)             | 15 (14.9)                   | 0.003           |
| <b>O2 therapy after SU stay, n (%)</b>              | 21 (7.6)           | 1 (5.0)               | 8 (6.0)                     | 0.857           | 2 (9.1)               | 10 (9.9)                    | 0.908           |
| <b>SBP, mmHg , (mean±SD)</b>                        | 158.8±30.6         | 163.6±29.1            | 155.7±31.5                  | 0.298           | 167.3±29.5            | 160.0±19.8                  | 0.300           |
| <b>DBP, mmHg (mean±SD)</b>                          | 85.7±15.5          | 89.4±12.8             | 85.7±16.6                   | 0.339           | 86.3±14.6             | 84.8±14.6                   | 0.656           |
| <b>Nocturnal MBP, mmHg (mean±SD),</b>               | 93.3±13.6          | 97.4±16.2             | 92.6±13.6                   | 0.151           | 97.5±14.4             | 92.5±12.9                   | 0.110           |
| <b>Severe Desaturation time (SpO2 &lt;90%), min</b> | 2.3±6.2            | 2.5±4.9               | 1.8±3.9                     | 0.445           | 5.8±15.1              | 2.1±5.4                     | 0.271           |
| <b>Mean nocturnal saturation, (mean±SD) %</b>       | 97.1±1.4           | 97.0±1.3              | 97.3±1.3                    | 0.431           | 96.5±1.3              | 97.1±1.5                    | 0.092           |
| <b>ODI, (mean±SD)</b>                               | 2.8±2.6            | 4.3±3.1               | 2.4±2.3                     | 0.020           | 4.4±3.1               | 2.8±2.6                     | 0.028           |

END: early neurologic deterioration; NOD: nocturnal oxygen desaturation; SBP: systolic blood pressure, SD: standard deviation; DBP: diastolic blood pressure, MBP: mean blood pressure; ODI: oxygen desaturation index

**Table S3. Laboratory data in patients with and without early neurological deterioration according to sex.**

|                                           | Male (n = 153)        |                             |                 | Female (n = 123)      |                             |                 |
|-------------------------------------------|-----------------------|-----------------------------|-----------------|-----------------------|-----------------------------|-----------------|
|                                           | END group<br>(n = 20) | Non- END group<br>(n = 133) | <i>P</i> -value | END group<br>(n = 22) | Non- END group<br>(n = 101) | <i>P</i> -value |
| <b>WBC, x10<sup>3</sup>/µl (mean±SD)</b>  | 8.32±3.17             | 8.12±2.64                   | 0.765           | 8.11±2.76             | 8.46±3.60                   | 0.670           |
| <b>Hb, g/dL (mean±SD)</b>                 | 13.43±2.34            | 13.55±1.92                  | 0.817           | 13.25±1.80            | 12.76±1.86                  | 0.269           |
| <b>HDL, mg/dL (mean±SD)</b>               | 48.40±13.61           | 45.85±13.89                 | 0.444           | 48.86±14.46           | 47.39±12.63                 | 0.632           |
| <b>TG, mg/dL (mean±SD)</b>                | 118.30±74.53          | 103.08±45.32                | 0.207           | 101.18±27.26          | 105.28±50.90                | 0.715           |
| <b>Total cholesterol, mg/dL (mean±SD)</b> | 187.00±41.36          | 161.82±35.32                | 0.004           | 195.50±46.27          | 175.63±43.44                | 0.105           |
| <b>FBS, mg/dL (mean±SD)</b>               | 113.40±33.91          | 101.21±26.59                | 0.068           | 115.64±54.40          | 103.51±26.31                | 0.318           |
| <b>Fibrinogen, mg/dL (mean±SD)</b>        | 357.70±78.10          | 325.84±71.78                | 0.069           | 332.09±66.07          | 326.90±79.90                | 0.777           |

END: early neurological deterioration, WBC: white blood cell, SD: standard deviation, Hb: hemoglobin, HDL: high density lipoprotein, TG: triglyceride, FBS: fasting blood sugar

**Table S4. Factors associated with early neurological deterioration according to sex.**

|                          | <b>Unadjusted OR<br/>(95% CI)</b> | <b>P value</b> | <b>Adjusted OR<br/>(95% CI)</b> | <b>P value</b> |
|--------------------------|-----------------------------------|----------------|---------------------------------|----------------|
| <b>Male</b>              |                                   |                |                                 |                |
| <b>NOD</b>               | 6.44 (2.29-18.06)                 | <0.001         | 6.86 (2.10-22.41)               | 0.001          |
| <b>Total cholesterol</b> | 1.02 (1.01-1.03)                  | 0.006          | 1.02 (1.01-1.03)                | 0.005          |
| <b>Female</b>            |                                   |                |                                 |                |
| <b>NOD</b>               | 4.78 (1.75-13.02)                 | 0.002          | 5.57 (1.82-17.10)               | 0.003          |

NOD: nocturnal oxygen desaturation

Male group: Adjusting for NOD, initial NIHSS, mean nocturnal saturation, fasting blood sugar, fibrinogen and total cholesterol

Female group: Adjusting for NOD, mean nocturnal saturation, and atrial fibrillation

**Table S5. Baseline characteristics of included patients and excluded patients with O2 therapy during stroke unit care.**

|                                        | <b>Included patients (n=285)</b> | <b>Excluded patients with O2 therapy during SU care (n=15)</b> | <b>P-value</b> |
|----------------------------------------|----------------------------------|----------------------------------------------------------------|----------------|
| <b>Age (mean±SD), years</b>            | 68.2±12.3                        | 71.3±15.6                                                      | 0.354          |
| <b>Male, n (%)</b>                     | 158(55.4)                        | 8(53.3)                                                        | 0.873          |
| <b>BMI (mean±SD), kg/m<sup>2</sup></b> | 23.3±3.3                         | 21.9±3.3                                                       | 0.112          |
| <b>Hypertension, n (%)</b>             | 200(70.2)                        | 13(86.7)                                                       | 0.245          |
| <b>Diabetes mellitus, n (%)</b>        | 75(26.3)                         | 8(53.3)                                                        | 0.035          |
| <b>Hyperlipidemia, n (%)</b>           | 96(33.7)                         | 5(33.3)                                                        | 0.978          |
| <b>Smoking, n (%)</b>                  | 91(31.9)                         | 4(26.7)                                                        | 0.782          |
| <b>Previous stroke/TIA, n (%)</b>      | 83(29.1)                         | 4(26.7)                                                        | 0.838          |
| <b>Atrial fibrillation, n (%)</b>      | 72(25.3)                         | 6(40.0)                                                        | 0.229          |
| <b>Initial NIHSS [median,(IQR)]</b>    | 3(1-8)                           | 13(5-19)                                                       | 0.002          |
| <b>Discharge NIHSS [median,(IQR)]</b>  | 2(0-5)                           | 13(11-18)                                                      | <0.001         |
| <b>Stroke mechanism, n (%)</b>         |                                  |                                                                | 0.491          |
| <b>LAA</b>                             | 85(29.8)                         | 3(20.0)                                                        |                |
| <b>SVO</b>                             | 48(16.8)                         | 1(6.7)                                                         |                |
| <b>CE</b>                              | 93(32.6)                         | 8(53.3)                                                        |                |
| <b>Other determined</b>                | 28(9.8)                          | 1(6.7)                                                         |                |
| <b>Undetermined</b>                    | 31(10.9)                         | 2(13.3)                                                        |                |
| <b>END, n (%)</b>                      | 42(14.7)                         | 3(20.0)                                                        | 0.478          |

END: early neurological deterioration, SD: standard deviation, BMI: body mass index, TIA: transient ischemic attack, LAA: large artery atherosclerosis, SVO: small-vessel occlusion, CE: cardioembolism, SU: Stroke Unit

**Figure S1. Kaplan-Meier event curves for END from Admission time to 7 days after admission in both sexes.**

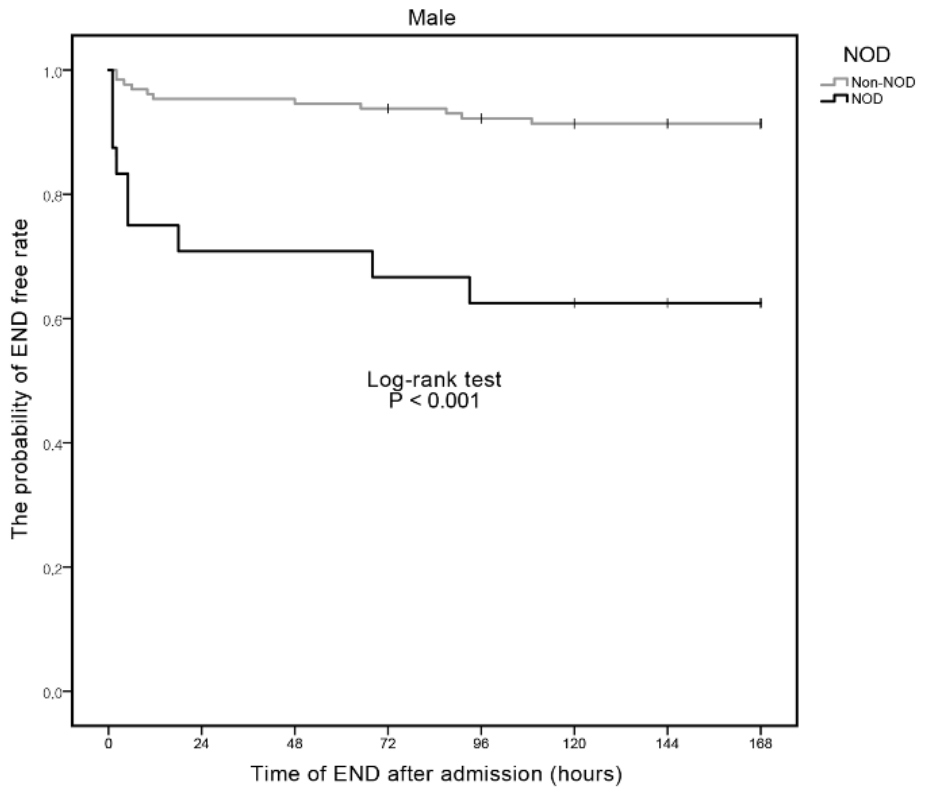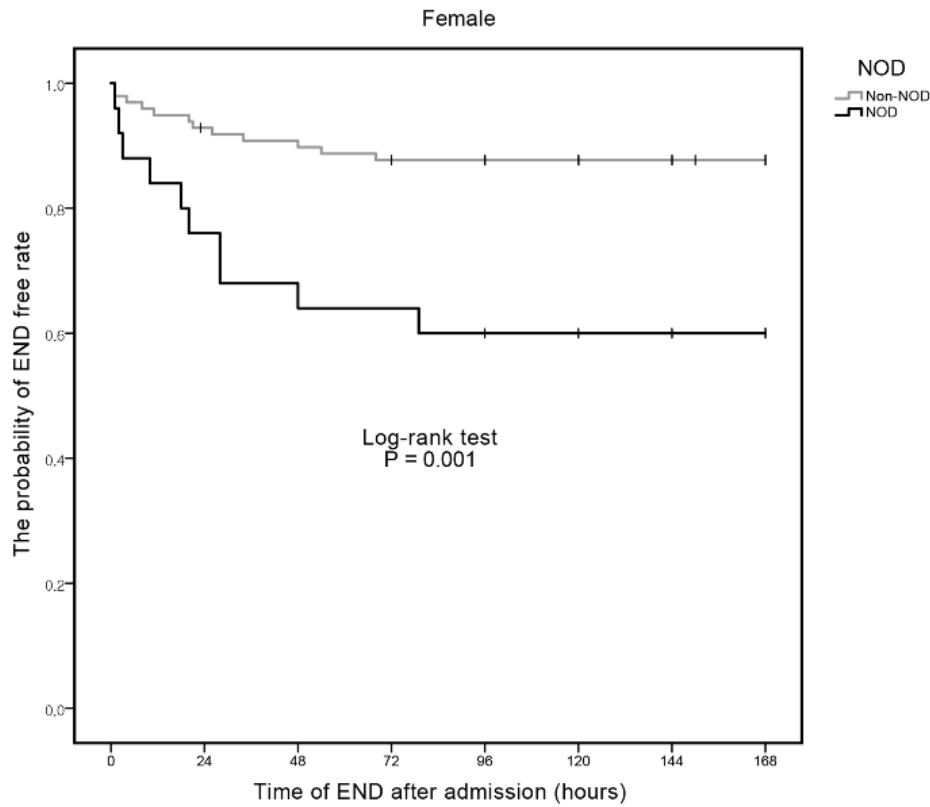

The probability of END-free was different between patients with and without nocturnal desaturation. This trend was similar in both sexes.
